# Supplementary material
Source: publisher site journal article supplement (https://www.dovepress.com/article/531836)
Supplement: Supplementary file 1 [file 531836%20Supplementary%20Material.docx]

Table S1 Laboratory costs of persons with psoriasis (ICD-10 L40) and first systemic prescription after a drug-free period of 180 days (biological and non-biological) treatment in 2019 by Charlson comorbidity index

| CCI | ≥1 Rx (N) | ≥1 Lab service per PE  n (%) | Mean per PE (€) | SD per PE (€) | Range (€) | Median (€) | IQR [25%; 75%] (€) | Total lab costs (€) |
| --- | --- | --- | --- | --- | --- | --- | --- | --- |
| 0 | 2,040 | 1,794 (87.94) | 20.44 | 33.96 | 0.25–386.55 | 6.75 | [2.75; 18.40] | 36,674.30 |
| 1 | 1,912 | 1,741 (91.06) | 22.72 | 35.99 | 0.25–366.50 | 8.85 | [3.50; 22.40] | 39,558.40 |
| 2 | 1,137 | 1,058 (93.05) | 23.47 | 34.57 | 0.25–376.40 | 11.05 | [4.75; 26.45] | 24,835.15 |
| 3 | 795 | 758 (95.35) | 25.46 | 31.62 | 0.25–248.15 | 14.45 | [6.25; 31.45] | 19,297.35 |
| 4 | 584 | 563 (96.40) | 29.46 | 36.78 | 0.25–315.90 | 18.50 | [7.60; 35.30] | 16,587.30 |
| 5 | 421 | 408 (96.91) | 30.90 | 33.98 | 0.50–285.30 | 21.63 | [9.95; 37.65] | 12,607.10 |
| 6 | 318 | 312 (98.11) | 35.24 | 33.75 | 0.50–192.20 | 26.60 | [11.23; 43.48] | 10,994.55 |
| 7 | 194 | 185 (95.36) | 41.56 | 38.66 | 1.75–314.45 | 33.75 | [18.50; 47.70] | 7,689.50 |
| 8 | 188 | 178 (94.68) | 40.48 | 31.16 | 0.50–148.00 | 33.68 | [19.00; 56.95] | 7,205.65 |
| 9 | 135 | 132 (97.78) | 44.46 | 42.71 | 1.15–294.65 | 31.13 | [16.80; 57.40] | 5,868.75 |
| 10 | 104 | 102 (98.08) | 46.00 | 48.74 | 1.00–339.55 | 32.40 | [14.80; 55.40] | 4,691.55 |
| 11 | 68 | 65 (95.59) | 44.61 | 44.97 | 0.25–260.95 | 36.00 | [14.65; 54.30] | 2,899.60 |
| 12 | 34 | 33 (97.06) | 48.65 | 48.45 | 0.50–211.55 | 32.45 | [18.75; 52.00] | 1,605.45 |
| 13 | 38 | 36 (94.74) | 62.47 | 80.54 | 3.40–418.50 | 44.10 | [27.88; 63.25] | 2,249.05 |
| 14 | 15 | 15 (100.00) | 58.10 | 44.96 | 4.15–146.55 | 51.00 | [17.50; 93.40] | 871.55 |
| 15 | 12 | 12 (100.00) | 69.21 | 93.45 | 1.00–340.40 | 36.50 | [25.25; 71.68] | 830.50 |
| 16 | 13 | 13 (100.00) | 68.15 | 75.47 | 2.00–275.60 | 45.10 | [29.15; 86.15] | 885.95 |
| 17 | 8 | 8 (100.00) | 84.29 | 49.64 | 2.50–143.45 | 96.58 | [46.03; 121.58] | 674.30 |
| 20 | 1 | 1 (100.00) | 314.85 | - | - | - | - | 314.85 |
| 22 | 1 | 1 (100.00) | 71.50 | - | - | - | - | 71.50 |
| Total | 8,018 | 7,415 (92.48) | 26.49 | 36.81 | 0.25-418.50 | 12.10 | [4.75; 32.25] | 196,412.35 |

Note: Rx = prescription; PE = persons; SD = Standard deviation, IQR = Interquartile rang

**Table S2** Costs of laboratory services in prevalent persons with Psoriasis (ICD-10 L40) and first systemic prescription after a drug-free period of 180 days (biological and non-biological) treatment in 2019 (N = 8,018)

| Parameters | Lab service | ≥1 Lab service per PE n (%) | Mean per PE (€) | SD per PE (€) | Range (€) | Median (€) | IQR [25%; 75%] (€) | Total lab services (n) |
| --- | --- | --- | --- | --- | --- | --- | --- | --- |
| Complete blood count | Blood count | 5,746 (71.66) | 1.86 | 2.01 | 0.50–25.00 | 1.00 | [0.50; 2.50] | 10,696.50 |
| Differential blood count | 121 (1.51) | 1.18 | 1.37 | 0.40–10.00 | 0.40 | [0.40; 1.60] | 143.20 |
| Total* | 5,752 (71.74) | 1.88 | 2.06 | 0.40–27.00 | 1.00 | [0.50; 2.50] | 10,839.70 |
| Liver function test | AP | 4,380 (54.63) | 1.01 | 1.08 | 0.25–15.75 | 0.75 | [0.25; 1.25] | 4,415.25 |
| AST | 5,305 (66.16) | 1.02 | 1.03 | 0.25–11.50 | 0.75 | [0.25; 1.25] | 5,434.25 |
| ALT | 6,053 (75.49) | 1.16 | 1.14 | 0.25–16.00 | 0.75 | [0.50; 1.50] | 7,008.75 |
| γGT | 6,374 (79.50) | 1.14 | 1.11 | 0.25–16.00 | 0.75 | [0.50; 1.50] | 7,288.50 |
|  | Total* | 6,604 (82.36) | 3.66 | 3.94 | 0.25–57.50 | 2.50 | [1.00; 5.00] | 24,146.75 |
| Bilirubin, total | Bilirubin, total | 2,667 (33.26) | 0.82 | 1.04 | 0.25–11.50 | 0.50 | [0.25; 1.00] | 2,174.00 |
| Amino terminal procollagen peptide (PIIINP) | Amino terminal procollagen peptide (PIIINP) | 280 (3.49) | 37.38 | 37.59 | 22.80–342.00 | 22.80 | [22.80; 45.60] | 10,465.20 |
| Hepatitis | Hepatitis B and hepatitis C serology | 868 (10.83) | 32.16 | 18.77 | 5.50–171.00 | 26.70 | [21.20; 39.20] | 27,917.90 |
| Tuberculosis screening | Interferon gamma release assay | 550 (6.86) | 63.59 | 19.16 | 58.00–174.00 | 58.00 | [58.00; 58.00] | 34,974.00 |
| Urine status | U-stix (until 31.03.2019) | 3,381 (42.17) | 1.17 | 1.02 | 0.50–9.00 | 1.00 | [0.50; 1.50] | 3,941.00 |
| Urine strip test (from 01.04.2019) | 2,419 (30.17) | 1.19 | 1.02 | 0.50–10.50 | 1.00 | [0.50; 1.50] | 2,877.50 |
| Uric acid levels | 5,014 (62.53) | 0.85 | 0.89 | 0.25–12.50 | 0.50 | [0.25; 1.00] | 4,260.00 |
|  | Total* | 6,335 (79.01) | 1.75 | 1.72 | 0.25–14.75 | 1.25 | [0.50; 2.25] | 11,078.50 |
| Glucose | Fasting glucose (fasting blood sugar) | 3,028 (37.77) | 13.43 | 10.66 | 4.00–100.00 | 8.00 | [4.00; 20.00] | 40,668.00 |
| Pregnancy test | Pregnancy detection | 41 (0.51) | 2.57 | 2.93 | 1.30–15.60 | 1.30 | [1.30; 2.60] | 105.30 |
| Immunological tests | Serum albumin | 844 (10.53) | 9.30 | 11.46 | 3.40–156.40 | 6.80 | [3.40; 10.20] | 7,850.60 |
| Renal function tests | Serum creatinine | 6,885 (85.87) | 1.57 | 1.54 | 0.25–17.45 | 1.20 | [0.50; 2.00] | 10,837.75 |
| Minerals | Potassium | 4,783 (59.65) | 0.88 | 1.08 | 0.25–12.00 | 0.50 | [0.25; 1.00] | 4,227.00 |
| Sodium | 4,192 (52.28) | 0.85 | 1.06 | 0.25–12.00 | 0.50 | [0.25; 1.00] | 3,560.50 |
| Magnesium | 270 (3.37) | 3.01 | 4.36 | 1.40–39.20 | 1.40 | [1.40; 2.80] | 813.40 |
| Total* | 4,926 (61.44) | 1.75 | 2.65 | 0.25–53.20 | 1.00 | [0.50; 2.00] | 8,600.90 |
| Lipids | Total Cholesterol | 4,167 (51.97) | 0.63 | 0.61 | 0.25–12.50 | 0.50 | [0.25; 0.75] | 2,640.00 |
| HDL cholesterol | 3,198 (39.89) | 0.56 | 0.52 | 0.25–12.50 | 0.25 | [0.25; 0.75] | 1,793.00 |
| Fasting triglycerides | 3,786 (47.22) | 0.61 | 0.59 | 0.25–12.50 | 0.50 | [0.25; 0.75] | 2,320.75 |
| Total* | 4,413 (55.04) | 1.53 | 1.57 | 0.25–37.50 | 1.00 | [0.75; 2.00] | 6,753.75 |
| Total* |  | 8,018 (92.48) | 26.49 | 36.81 | 0.25–418.50 | 12.10 | [4.75; 32.25] | 196,412.35 |

Note: Rx = prescription; [P](https://www.abbreviations.com/term/1659743)E = persons; SD = Standard deviation; IQR = Interquartile range

*Multiple counting possible
